1           **Composition of the North American wood frog (*Rana sylvatica*) skin microbiome and**  
2                                   **seasonal variation in community structure**

3                   Alexander J. Douglas<sup>1</sup>, Laura. A. Hug<sup>1</sup>, and Barbara A. Katzenback<sup>1,\*</sup>

4           <sup>1</sup>Department of Biology, University of Waterloo, Waterloo, Ontario, Canada, N2L 3G1

5  
6  
7  
8  
9  
10   \*Correspondence:

11                   Dr. Barbara A. Katzenback  
12                   Department of Biology  
13                   200 University Avenue West  
14                   University of Waterloo  
15                   Waterloo, ON, Canada, N2L 3G1  
16                   Phone: (519) 888 4567 x 30192  
17                   E-mail: barb.katzenback@uwaterloo.ca

18  
19   ORCID iD(s):

20                   A.J.D. 0000-0002-6902-8701  
21                   L.A.H. 0000-0001-6171-5040  
22                   B.A.K. 0000-0001-5974-9428

29 **Abstract**

30           While a number of amphibian microbiomes have been characterized, it is unclear how  
31 microbial communities might vary in response to seasonal changes in the environment and the  
32 behaviors which many amphibians exhibit. Given recent studies demonstrating the importance of  
33 the skin microbiome in frog innate immune defenses against pathogens, investigating how  
34 changes in the environment impact the microbial species present, and thus their potential  
35 contribution to skin host defense, will provide a better understanding of conditions that may alter  
36 host susceptibility to pathogens in their environment. We sampled the skin microbiome of North  
37 American wood frogs (*Rana sylvatica*) from two breeding ponds in the spring, along with the  
38 microbial community present in their vernal breeding pools, and frogs from the nearby forest  
39 floor in the summer and fall to determine whether the microbial composition differs by sex,  
40 vernal pond site, or temporally across season (spring, summer, fall). Taxon abundance data  
41 reveals a profile of bacterial phyla similar to those previously described on anuran skin, with  
42 Proteobacteria, Bacteroidetes, and Actinobacteria dominating the wood frog skin microbiome.  
43 Our results indicate that sex had no significant effect on skin microbiota diversity, however, this  
44 may be due to our limited female sample size. Vernal pool site had a small but significant effect  
45 on skin microbiota, but skin-associated communities were more similar to each other than to the  
46 communities observed in the frogs' respective pond water. Across seasons, diversity analyses  
47 suggest there are significant differences between the skin microbiome of frogs from spring and  
48 summer/fall groups while the average  $\alpha$ -diversity per frog remained consistent. Bacterial genera  
49 known to have antifungal properties such as *Pseudomonas* spp. and *Rhizobium* spp. were  
50 prevalent, and several were considered core microbiota during at least one season. These results  
51 illustrate seasonal variation in wood frog skin microbiome structure and highlight the importance

52 of considering temporal trends in an amphibian microbiome, particularly for species whose life  
53 history requires recurrent shifts in habitat and behavior.

54 **Keywords:** Microbiome, Amphibian, *Rana sylvatica*, Skin, Innate Immunity, Season

## 55 **1 Introduction**

56 Amphibians have unique communities of skin-dwelling microbes regulated by various  
57 mechanisms, including inoculation from the environment, skin-sloughing and specific skin  
58 secretions [1, 2]. Studies of the amphibian skin microbiome have revealed that while many  
59 bacterial phyla are present, species from Acidobacteria, Actinobacteria, Bacteroidetes,  
60 Cyanobacteria, Firmicutes and Proteobacteria tend to dominate [1, 3-5]. Many families and  
61 genera within these phyla are present on a wide range of amphibian species, but the specific  
62 species tend to be unique to the host. Additionally, species which dominate the skin-associated  
63 community are not generally those which are dominant in the environment at large, and therefore  
64 must be selected for by the skin microenvironment [1]. Further microbiome studies have shown  
65 that frogs of the same species sampled during different seasons or from different habitats can  
66 have large differences in the diversity of bacteria present on their skin [4, 6, 7], underscoring the  
67 influence of environmental factors on the microbial community. Most studies of amphibian  
68 microbiota have been performed on amphibian species from tropical or subtropical climates,  
69 meaning data on temperate amphibian species is less comprehensive. Therefore, it is currently  
70 unclear how stronger seasonal differences in climate and host behavior might influence the  
71 amphibian skin microbiome.

72 Although the functional significance of amphibian skin microbiota are not yet well  
73 defined, recent studies have highlighted the importance of the skin commensal microbiome to the  
74 amphibian host skin defense mechanisms against invading pathogens [2, 8-10]. Through the  
75 production of antifungal metabolites [11], some bacterial species commonly found on the skin of  
76 amphibians inhibit the growth of the pathogenic fungi *Batrachochytrium dendrobatidis* [12, 13],  
77 the causative agent of amphibian chytridiomycosis and proximate cause of amphibian declines

78 on multiple continents [14, 15]. Transfer of these specific bacteria to the skin of salamanders  
79 suffering from chytridiomycosis reduced the severity of symptoms [16], which made a strong  
80 case for the protective effects of select commensal bacterial species and has spurred the use of  
81 bacterial species as probiotic washes for target amphibian populations [17]. However, the  
82 effectiveness of specific bacteria to inhibit infection has been shown to vary based on factors  
83 such as the strains of the symbiont and pathogen as well as temperature [18], so it is unlikely that  
84 any single species of bacteria would provide universal protection. Additionally, pathogen  
85 infection drives changes in the structure of bacterial communities on the skin and correlates with  
86 lower community diversity [19-21]. It is increasingly clear that the characteristics of the  
87 amphibian skin microbiome are related to infection status and that the structure and diversity of  
88 the commensal microbial community may be key to predicting pathogen resistance. Thus,  
89 understanding how frog skin microbial community composition varies across environmental  
90 conditions would provide important information in predicting environments where amphibians  
91 may be more or less susceptible to pathogens.

92         The North American wood frog (*Rana sylvatica*) is widespread with a range extending  
93 through most of Canada, Alaska, and the Northeastern United States [22]. *R. sylvatica* inhabits  
94 uplands environments and the far north where few, if any, other frog species inhabit. Wood frogs  
95 breed in temporary pools in the early spring, leave these pools to migrate upland into the  
96 terrestrial forest environment during warmer months [23] and hibernate on the forest floor in  
97 winter, routinely surviving multiple sustained bouts of whole body freezing [24, 25]. *R. sylvatica*  
98 is susceptible to infection by Frog Virus 3 and *B. dendrobatidis* [26, 27], pathogens which  
99 threaten amphibian populations worldwide. Despite the wide range of *R. sylvatica* and its known  
100 susceptibility to pathogens of concern, no comprehensive study of skin microbiota has ever been

101 performed on this species. Given the seasonal shifts in habitat and behavior experienced by *R.*  
102 *sylvatica*, they are well-suited to investigate trends which may apply to other temperate species,  
103 such as whether seasonal changes in microbiome composition might lead to windows of  
104 particular protection from, or susceptibility to, amphibian pathogens, as has been explored in  
105 other species [20, 28, 29].

106 The objectives of this study are to (1) identify the composition of the *R. sylvatica* skin  
107 microbiome and (2) determine whether the skin microbiome community structure varies with  
108 sex, vernal pool of origin or across seasons. It is hypothesized that the wood frogs carry a range  
109 of bacterial phyla similar to other frog skin microbiomes, with variation in representation and  
110 abundance of bacterial taxa between individuals to reflect separate ponds of origin and season of  
111 capture. To determine whether this is the case, we have analyzed the microbial community  
112 present on the skin of *R. sylvatica* using 16S rRNA gene amplicon sequencing. Skin swabs were  
113 obtained from frogs captured from two spatially separated ponds in the spring, and the  
114 surrounding forest in summer and fall so that skin-associated microbial communities might be  
115 compared on a seasonal basis, as well as between different capture sites.

## 116 **2 Materials and Methods**

### 117 **2.1 Experimental Design & Sample Collection**

118 Wild *R. sylvatica* adults were sampled from a site in the Waterloo Region of Ontario,  
119 Canada, during the spring (April - May), summer (July - August) and fall (October). In the  
120 spring, individuals were captured from two vernal ponds spatially separated by ~200 m, herein  
121 referred to as Pond 1 and Pond 2, while individuals were captured from the surrounding forest  
122 floor during the summer and fall seasons. Frog skin microbiota sample sizes were dependent on

123 the number of frogs that could be captured successfully. Sampling numbers are given for each  
124 site and season in **Table 1**.

125 Individuals were captured by nets and each frog was handled with a new pair of sterile  
126 nitrile gloves. Wood frogs were gently rinsed with sterile distilled water to remove transient  
127 microbes. To collect resident microbes frogs were swabbed with a sterile rayon-tipped applicator  
128 (Puritan Medical Products Company, LLC., Guilford, ME, USA) 12 times on both the dorsal and  
129 ventral surfaces, covering as much of the skin surface as possible. To control for environmental  
130 microbes that may have deposited onto the swab during the sampling process, “field control”  
131 swabs were produced by wetting a clean rayon swab with sterile distilled water and mimicking  
132 the swabbing action in the open air. Each rayon swab head was placed into a sterile 1.7 mL  
133 microfuge tube and the applicator stick cut just above the rayon tip using flame-sterilized  
134 scissors. Samples were transported on ice prior to storage at -80 °C. Animal care and handling  
135 was performed in accordance with the guidelines of the University of Waterloo Animal Care  
136 Committee and the Canadian Council on Animal Care (Animal Utilization Projects #30008 and  
137 #40721), and animals captured under the Ontario Ministry of Natural Resources and Forestry  
138 Wildlife Scientific Collectors Authorization Permits (#1088586 and 1092603) issued to Dr. B.A.  
139 Katzenback.

140 When individuals were captured from vernal pools, a water sample was taken by pushing  
141 50 mL of pond water, taken from just below the surface of the water, through a Sterivex-GP PES  
142 0.22 µm filter (Millipore, Burlington, MA, USA) using a 50 mL syringe (Fisher). The filter units  
143 were disconnected from the syringe, placed in individual sterile 50 mL conical tubes (FroggaBio)  
144 and held on ice prior to storage at -80 °C.

## 145 **2.2 DNA Isolation and Amplicon Sequencing**

146 DNA isolation was performed using the DNeasy PowerSoil Kit (QIAGEN Inc., Venlo,  
147 Netherlands) according to the manufacturer's protocol. Frog skin swab samples or field controls  
148 were removed from -80 °C and immediately transferred from their storage tubes into PowerBead  
149 tubes. DNA was isolated from vernal pool microbiota filtrate by removing the filter paper from  
150 the cartridge and cutting the filter paper into thin strips using flame-sterilized scissors before  
151 addition to the PowerBead tubes. To control for bacterial contamination from the laboratory  
152 environment and/or the extraction kit components, a clean rayon swab was wet with sterile  
153 distilled water and cut into a labelled 1.7 mL microfuge tube with flame sterilized scissors to act  
154 as a "process control" and was processed alongside the samples. All samples (skin swabs, vernal  
155 pool filters, field controls, process controls) were immediately vortexed for 10 s after transfer to  
156 the PowerBead tubes prior to following the manufacturer's protocol. Isolated DNA was eluted in  
157 the provided elution buffer and stored at -80 °C.

158 Presence of bacterial DNA was confirmed using PCR amplification. Each reaction  
159 contained 18.875 µL of molecular biology grade water, 2.5 µL of 10× PCR buffer, 0.5 µL of 10  
160 µM dNTPs, 1 µL of 10 µM forward primer 515FB 5'-GTGYCAGCMGCCGCGGTAA-3' [30,  
161 31], 1 µL of 10 µM reverse primer 926R 5'-CCGYCAATTYMTTTRAGTTT-3' [30, 32], and  
162 0.125 µL Taq DNA polymerase (5 units/µL) (GeneDirex) per 1 µL of sample, for a total reaction  
163 volume of 25 µL. PCR was performed with the following cycling conditions: 94 °C for 3 min,  
164 then 35 cycles of 94 °C for 45 s, 50 °C for 1 min and 72 °C for 1.5 min, followed by extension at  
165 72 °C for 5 min. PCR product were separated by electrophoresis at 130 V for 30 min on 2%  
166 agarose gel in TAE buffer and visualized using SafeRed dye and trans-UV (302 nm) imaging in  
167 a ChemiDoc XRS+ (Bio-Rad).



168 Samples were sent for 16S rRNA gene amplicon sequencing by MetagenomBio  
169 (Waterloo, ON, Canada). PCR reactions were prepared in triplicate for each sample. Each 25  $\mu$ L  
170 reaction mixture contained 1.6  $\mu$ L of molecular grade water, 0.2  $\mu$ L of BSA (20 mg/mL), 2.5  $\mu$ L  
171 of 10 $\times$  standard Taq buffer, 0.5  $\mu$ L of 10 mM dNTPs, 5.0  $\mu$ L of 1  $\mu$ M forward primer 515FB 5'-  
172 GTGYCAGCMGCCGCGGTAA-3' [30, 31], 5.0  $\mu$ L of 1  $\mu$ M reverse primer 806RB 5'-  
173 GGACTACNVGGGTWTCTAAT-3' [30, 31], 0.2  $\mu$ L of Taq DNA polymerase (5 units/ $\mu$ L), and  
174 10  $\mu$ L of sample DNA. PCR was performed with the following thermocycling conditions: 95°C  
175 for 5 min, 35 cycles of 95°C for 30 s, 50°C for 30 s and 72°C for 60 s, followed by an extension  
176 at 72°C for 10 min. The products of the triplicate reactions were pooled and resolved with 2%  
177 TAE agarose gel. PCR products of the correct amplicon size (~ 291 bp) were excised, pooled,  
178 gel purified and quantified using the Invitrogen™ Qubit™ dsDNA HS Assay Kit (Thermo Fisher  
179 Scientific Inc., Waltham, MA, USA). For all 2018 samples sequencing was performed using an  
180 Illumina MiSeq and the MiSeq Reagent Kit v2 (Illumina, Inc., San Diego, CA, USA) for 2 sets  
181 of 250 cycles. This was increased to 3 sets of 250 cycles for all 2019 samples due to an error at  
182 the sequencing center

### 183 **2.3 Amplicon Sequence Data Processing**

184 Sequence data was obtained as FASTQ files in the CASAVA 1.8 paired-end  
185 demultiplexed format. Files from repeat sequencing runs were concatenated to create a FASTQ  
186 file containing all of the observed sequences for each sample. These files were imported into  
187 QIIME 2 v2019.1.0 [33] and all analysis was performed using QIIME 2 unless otherwise stated.

188 Using DADA2 [34], reads were trimmed by 25 bp on the 5' end to remove the primer  
189 sequence and truncated to 245 bp to remove low quality regions, filtering out any reads shorter  
190 than this length. The reads were dereplicated, denoised and any chimeric sequences were

191 removed. Paired forward and reverse reads were merged, generating the final amplicon sequence  
192 variants (ASVs). Each ASV was assigned taxonomy using a naïve Bayesian classifier trained on  
193 the SSU Ref NR 99 dataset from the SILVA 132 release [35], with sequences trimmed to include  
194 only the V4-V5 region. All unassigned ASVs and those assigned to chloroplast or mitochondria  
195 were filtered from the samples. To minimize erroneous ASVs, a minimum frequency of 22  
196 (0.001% of the total sequence count) was set, and any ASVs with a total frequency less than 22  
197 were filtered from the samples.

## 198 **2.4 Taxonomic Assignment and Significance**

199 A multiple sequence alignment (MSA) was produced from the ASVs using MAFFT [36].  
200 Columns of the alignment which were ambiguously aligned were masked to avoid introducing  
201 error to the phylogenetic model. A phylogenetic tree was generated from the MSA using  
202 RAxML [37] with 100 bootstraps. The RAxML tree was assigned a midpoint root and used for  
203 all further phylogenetic analysis.

204 Core taxa were determined for each group of seasonal frog skin communities, and for the  
205 overall frog skin microbiome, using the core-features command in QIIME2. Core taxa were  
206 defined as those found to be present in 90% or more of the samples within a given group, as this  
207 is a commonly used threshold [6, 38] which meets the definition of core microbiota as those  
208 which are commonly present within samples from a given environment [39]. Venn diagrams  
209 depicting the overlap of seasonally core microbiota were prepared using the online Venn  
210 diagram tool provided by the University of Ghent  
211 (<http://bioinformatics.psb.ugent.be/webtools/Venn/>).

212 To assess the presence of microbiota with putative antifungal activity, bacterial taxa  
213 identified from the *R. sylvatica* skin microbiome were searched against the Antifungal Isolates  
214 Database [40]. The metadata file for the Antifungal Isolates Database was obtained and sorted  
215 based on genera, filtering for those genera which were detected on *R. sylvatica* skin. Genera with  
216 one or more antifungal isolates were considered putatively antifungal, and their relative  
217 abundances in the wood frog skin microbial community were compared between seasons.

## 218 **2.5 Statistical Analyses**

219 For diversity analyses, samples were rarified to 10,000 sequences. Those containing less  
220 than 10,000 were omitted from diversity analyses. The phylogenetic tree and rarified ASV  
221 frequencies were used to calculate various  $\alpha$ -diversity metrics (Faith's Phylogenetic Diversity,  
222 Shannon's Diversity Index, ASV richness). Diversity was compared between groups using a one-  
223 way analysis of variance (ANOVA).

224 To assess differences in microbial community composition between samples, various  $\beta$ -  
225 diversity metrics were calculated (Unweighted UniFrac, Weighted UniFrac and Bray-Curtis  
226 dissimilarity).  $\beta$ -diversity was visualized using principal coordinate analysis (PCoA). The *adonis*  
227 function from the R vegan package was used to perform permutational multivariate analysis of  
228 variance (PERMANOVA) with 999 permutations. To determine whether groups had significant  
229 differences in microbiome composition, pairwise PERMANOVA tests were applied to the  
230 dissimilarity matrix produced by each  $\beta$ -diversity metric and performed with 999 permutations.

231

## 232 3 Results

### 233 3.1 Microbiome Overview Statistics

234 We obtained microbial 16S rRNA amplicon sequences from each of the 66 frog swabs, 5  
235 water samples, 5 field blanks, and 3 process blanks. After filtering based on quality, taxonomy  
236 and minimum frequency, a total of 1,937,866 sequences remained. Sequence counts varied  
237 between samples considerably, and those samples sequenced in the later set (Spring 2019 frog  
238 swabs, water samples and associated blanks) had much higher counts on average due to their  
239 increased sequencing depth. A total of 4,325 ASVs were recognized, which ranged in frequency  
240 from 22 to 159,313 appearances, with a median frequency of 60. These ASVs were matched to  
241 1,384 unique taxonomic assignments, 1,123 of which were specific to at least the genus level.

242 We found that DNA isolated from process controls yielded ASVs belonging to 9 bacterial  
243 phyla and contained 37 ASVs each on average, which equated to a total of 71 unique taxa when  
244 combined at the genus level (**Supplementary Table 1**). Unlike the communities found on frog  
245 skin and in pond water, the majority of ASVs found in the process controls belonged to a limited  
246 group of genera, primarily *Curtobacterium* (43%), with *Lactobacillus* (16%) and *Acholeplasma*  
247 (7.7%) also more abundant. The field controls generally had more diverse communities, with an  
248 average of 64 ASVs per blank. These ASVs belonged to a total of 15 phyla, and 164 unique taxa  
249 when combined at the genus level (**Supplementary Table 2**). The genera with the greatest mean  
250 relative abundance was once again *Curtobacterium* (8.4%), but genera which were abundant on  
251 frog skin such as *Massilia* and *Pseudomonas* were also found to be abundant in the field blanks  
252 (4.1% and 3.8%, respectively). On average 11% of amplicons detected in frog skin samples and  
253 0.07% of amplicons detected in water samples were ASVs which were also found in the process  
254 controls, while an average of 35% of amplicons detected in frog skin samples and 32% of

255 amplicons detected in water samples were ASVs which were also found in the field controls. Of  
256 the 11% of the amplicons found on frogs which were shared with the process blank, the majority  
257 (5.8% of mean relative abundance) corresponded to a single ASV belonging to *Curtobacterium*.  
258 A large portion of the ASVs belonging to *Curtobacterium* were found on a group of five frogs  
259 where this ASV made up more than 50% of amplicons detected.

### 260 **3.2 Capture Site Influences the Structure of Microbial Communities**

261 Spring was the only season in which sampling occurred across two distinct sites, the two  
262 vernal pools. It was thus necessary to investigate how pond of origin might influence an  
263 individual's skin microbiome. We observed that the skin microbiota of wood frogs captured from  
264 Pond 1 and Pond 2 had very similar  $\alpha$ -diversity metrics, and both of the skin-associated  
265 communities had higher average microbial diversity than the microbial communities present in  
266 the water samples taken from either vernal pond (**Fig. 1**). When we sorted frog skin microbiota  
267 and vernal pond microbiota samples from spring 2018 and spring 2019 into groups based on  
268 their pond of origin, there were significant differences in  $\alpha$ -diversity (ANOVA: ASV richness:  $p$   
269 = 0.0017; Shannon diversity index:  $p$  = 0.0032; Faith's phylogenetic diversity:  $p$  = 0.0041).  
270 Differences were between the Pond 2 water and the Pond 1 frog skin (pairwise ANOVA: ASV  
271 richness:  $p$  = 0.0355; Shannon diversity index:  $p$  = 0.0629; Faith's phylogenetic diversity:  $p$  =  
272 0.0068) and between Pond 2 water and Pond 2 frog skin (pairwise ANOVA: ASV richness:  $p$  =  
273 0.0029; Shannon diversity index:  $p$  = 0.0114; Faith's phylogenetic diversity:  $p$  = 0.0035). There  
274 were no significant differences in community diversity between Pond 1 water and Pond 1 frog  
275 skin, Pond 1 water and Pond 2 frog skin, Pond 1 water and Pond 2 water or Pond 1 frog skin and  
276 Pond 2 frog skin.

277           The microbial communities present in each group of frog skin samples and water samples  
278 included many of the same bacterial phyla and had a high proportion of ASVs belonging to  
279 Proteobacteria, Bacteroidetes and Actinobacteria (**Fig. 2**). These three phyla were the only phyla  
280 we found to be highly abundant in the water samples, while all other phyla present had a mean  
281 relative abundance of less than 1%. The frog skin communities from both ponds also had  
282 Acidobacteria and Verrucomicrobia ASVs present at greater than 1% mean relative abundance,  
283 and Pond 2 frog skin community additionally had Firmicutes ASVs present at more than 1%  
284 mean relative abundance. We employed pairwise analysis of variance (ANOVA) to compare the  
285 relative abundance of each of these 6 common phyla between the water samples and frog skin  
286 samples from both ponds and no significant difference in abundance was observed for any of the  
287 phyla. Beyond the most abundant phyla, the frog skin microbiota exhibited a more diverse range  
288 of phyla compared to vernal pool microbiota; the skin-associated communities from frogs  
289 captured from Pond 1 and Pond 2 included ASVs from phyla that were not present in any pond  
290 water samples.

291           Sample type (frog skin microbiota, vernal pond microbiota), site (Pond 1, Pond 2) and  
292 year all had significant ( $p < 0.005$ ) but small ( $R^2 < 0.12$ ) effects on community composition and  
293 abundance of the observed taxa when assessed using *adonis* (**Table 2**). Sample type had the  
294 largest effect, particularly when considering abundance as observed with Weighted UniFrac  
295 distance (**Table 2b**, *adonis* pseudo-F = 6.86,  $p < 0.001$ ,  $R^2 = 0.11$ ) and Bray-Curtis dissimilarity  
296 (**Table 2c**, *adonis* pseudo-F = 7.71,  $p < 0.001$ ,  $R^2 = 0.12$ ). Effect of the sample type (**Table 2a**,  
297 *adonis* pseudo-F = 4.08,  $p < 0.001$ ,  $R^2 = 0.07$ ) and year (**Table 2a**, *adonis* pseudo-F = 4.20,  $p <$   
298  $0.001$ ,  $R^2 = 0.07$ ) had equal effects as observed with Unweighted UniFrac distance. Principal  
299 coordinate analysis of the  $\beta$ -diversity metrics did not reveal clear clustering of frog skin

300 microbiota by pond origin under any conditions (**Fig. 3**). Water samples were found to cluster  
301 separately from frog samples only when relying on Bray-Curtis dissimilarity values (**Fig. 3c**) and  
302 were not clearly distinguished from frog samples when considering phylogenetic diversity (**Fig.**  
303 **3a, b**). Given that the effect of site was relatively minor and the microbial communities of frogs  
304 from Ponds 1 and 2 were largely similar, we combined these groups in further analysis.

### 305 **3.3 Host Sex Does Not Affect Diversity and Structure of Microbial Communities**

306 Due to sampling limitations, very few female frogs ( $n = 8$ ) were included compared to the  
307 number of male frogs ( $n = 52$ ). All female frogs were captured during 2018, and the majority ( $n$   
308  $= 6$ ) were captured during spring, meaning that any sex-dependent microbiome characteristics  
309 might contribute to apparent seasonal differences. We found sex did not significantly affect  
310 microbiome diversity or structure. Comparing the  $\alpha$ -diversity metrics of all male and female  
311 frogs using a t-test with Welch's correction resulted in no significant difference for any metric  
312 observed (ASV richness:  $p = 0.3863$ ; Shannon diversity index:  $p = 0.2717$ ; Faith's phylogenetic  
313 diversity:  $p = 0.4585$ ). Additionally, sex was not a significant driver of community structure  
314 when assessed using *adonis* for the three  $\beta$ -diversity metrics used (Unweighted UniFrac: pseudo-  
315  $F = 1.13$ ,  $p = 0.241$ ,  $R^2 = 0.019$ ; Weighted UniFrac: pseudo- $F = 1.83$ ,  $p = 0.097$ ,  $R^2 = 0.031$ ;  
316 Bray-Curtis: pseudo- $F = 1.30$ ,  $p = 0.147$ ,  $R^2 = 0.022$ ).

### 317 **3.4 Season of Capture Influences the Structure of Microbial Communities**

318 To assess the influence of season on the skin microbiome the frog samples were divided  
319 into groups based on capture date (Spring 2018, Summer 2018, Fall 2018 and Spring 2019). The  
320 microbial communities of frog skin from each seasonal group were similarly rich and even (**Fig.**  
321 **4**). Of the three  $\alpha$ -diversity metrics we considered, two differed significantly between seasonal  
322 sample groups (ANOVA: ASV richness,  $p < 0.0001$ ; Faith's phylogenetic diversity,  $p < 0.0025$ ).

323 In both cases the mean diversity of the Spring 2019 group was significantly higher than that of  
324 Spring 2018 and Summer 2018, while no other groups had significantly different means.

325 We found that community structure differed between seasonal groups, including  
326 observable trends at the highest taxonomic levels (**Fig. 2**). While the majority of ASVs present in  
327 any given sample were typically Proteobacteria, the abundance of ASVs belonging to other  
328 major phyla such as Bacteroidetes, Actinobacteria, Verrucomicrobia and Acidobacteria varied  
329 considerably (**Fig. 2**). Five samples from Spring 2019 were notable outliers, which had a unique  
330 community structure not observed in other samples. These frogs were all captured on the first  
331 day of sampling in Spring 2019 at Pond 1 and were the only samples where ASVs belonging to  
332 Actinobacteria made up more than 40% of the sequences detected, while those belonging to  
333 Proteobacteria were much less abundant (below 40%). We assessed the variation in relative  
334 abundance of the 5 major phyla between seasonal groups using one-way ANOVA. All groups  
335 exhibited some seasonal variation (Acidobacteria,  $p < 0.0001$ ; Actinobacteria,  $p = 0.0138$ ;  
336 Bacteroidetes,  $p = 0.0345$ ; Proteobacteria,  $p = 0.0002$ ; Verrucomicrobia,  $p = 0.0389$ ).  
337 Acidobacteria was the only phylum showing a clear trend, with a significantly higher mean  
338 relative abundance (pairwise ANOVA:  $p < 0.0219$ ) in Summer and Fall 2018 (4.7% and 6.4%  
339 respectively) than Spring 2018 and 2019 (1.9% and 0.62%, respectively).

340 Season was a significant source of variation in community structure when measured  
341 using Unweighted UniFrac (**Table 3a**, *adonis* pseudo-F = 4.36,  $p < 0.001$ ,  $R^2 = 0.13$ ), Weighted  
342 UniFrac (**Table 3b**, *adonis* pseudo-F = 7.04,  $p < 0.001$ ,  $R^2 = 0.20$ ) and Bray-Curtis (**Table 3c**,  
343 *adonis* pseudo-F = 6.17,  $p < 0.001$ ,  $R^2 = 0.18$ ). We performed pairwise PERMANOVAs to  
344 determine which seasonal groups had significantly different community structure and every  
345 pairwise comparison revealed significant difference across all  $\beta$ -diversity metrics



346 (PERMANOVA:  $p = 0.001$ ), with the exception of the Summer and Fall 2018 frog skin  
347 microbiome groups which were not significantly different when considering Weighted UniFrac  
348 distance (PERMANOVA: pseudo-F = 2.60,  $p = 0.102$ ). Summer and Fall 2018 frog skin  
349 microbiomes from were found to be significantly different when considering Unweighted  
350 UniFrac distance (PERMANOVA: pseudo-F = 1.69,  $p = 0.045$ ) and Bray-Curtis dissimilarity  
351 (PERMANOVA: pseudo-F = 1.84,  $p = 0.045$ ), though we noted that  $p$  values were near-  
352 threshold in both cases. This result was reflected in the Principle Coordinate Analysis results  
353 (**Fig. 5**), where skin microbiota from frogs collected during the summer and fall tended to cluster  
354 together, and appeared to form a cluster distinct from the spring samples when Unweighted  
355 UniFrac (**Fig. 5a**) and Bray-Curtis distances (**Fig. 5c**) were considered, although summer and fall  
356 samples were not clearly distinct from spring samples when visualizing Weighted Unifrac  
357 distances (**Fig. 5b**).

### 358 **3.5 The Seasonal Core Microbiome**

359 We identified core microbiota for all frog skin samples as a whole, as well as for each  
360 seasonal group separately. No ASV was present in  $\geq 90\%$  of all frog skin microbiome samples, so  
361 ASVs were collapsed at the genus and family level to consider a more inclusive core  
362 microbiome. A group of 7 genera were present in  $\geq 90\%$  of all frog samples, accounting for  
363 approximately 11% of ASVs on the average individual (**Table 4**). A group of 11 families were  
364 present in  $\geq 90\%$  of all frog samples, accounting for 56% of ASVs on the average individual  
365 (**Table 5**). We analyzed the seasonal variation in abundance of the nine core families with a  
366 mean relative abundance greater than 1% (**Fig. 6**), revealing six bacterial families with  
367 significantly different mean relative abundance across seasonal groups: Beijerinckaceae,  
368 Burkholderiaceae, Caulobacteraceae, Sphingobacteriaceae, Spirosomaceae and

369 Xanthobacteracea (ANOVA:  $p < 0.05$ ). In all cases but Sphingobacteriaceae, Summer and Fall  
370 2018 abundances did not differ significantly. Similarly, Spring 2018 and 2019 significantly  
371 differed only in the abundance of Burkholderiaceae.

372         When considering each seasonal group of skin associated communities separately, it was  
373 revealed that 25 of the 52 core genera and 16 of the 43 core families were considered core during  
374 only one season (**Fig. 7**). Only two genera were core to all seasonal groups (**Fig. 7a**), indicating  
375 that the number of core microbiota observed when considering all frogs together (7) was not  
376 reflective of the core genera present during each individual season. The Spring 2018 and Spring  
377 2019 frog skin microbial communities had the most core genera in common (20), while Summer  
378 2018 and Fall 2018 had the second highest level of overlap (7). Additionally, the frog skin  
379 microbiota from Spring 2018 and Spring 2019 each had a larger number of in-season core  
380 genera, with 20 in Spring 2018 and 37 in Spring 2019 as compared to 13 in Summer 2018 and 14  
381 in Fall 2018. In comparison, a group of 8 families were core across all seasonal groups (**Fig. 7b**),  
382 but the consistent prevalence of these families was not always matched with a high relative  
383 abundance. We found that Burkholderiaceae was the only family to consistently have a mean  
384 relative abundance above 10% on wood frog skin, ranging from 13% in Fall 2018 to 44% in  
385 Spring 2018. Interestingly, there were 9 core families unique to the Fall 2018 wood frog skin  
386 group, while other seasonal groups had only 2-3 uniquely core families. Fall 2018 wood frog  
387 microbiomes also had the most core families overall at 26, followed by microbiota on wood frog  
388 skin in Spring 2019 with 25, Summer 2018 with 21, and Spring 2018 with 19. In all seasons  
389 except for Spring 2018, the core families present on wood frog skin were members of the phyla  
390 Actinobacteria, Bacteroidetes, Proteobacteria and Verrucomicrobia. The core families present on  
391 the skin of wood frogs in Spring 2018 lacked any members of Actinobacteria but included a

392 single representative from the Gemmatimonadetes. In all cases the majority of core families  
393 present on wood frog skin were from the Proteobacteria, which ranged from 44% to 68%  
394 summed relative abundance. In general, community structure appeared to be more consistent for  
395 microbial families than for individual genera.

### 396 **3.6 Putative Antifungal Taxa Are Present on the Skin of Wood Frogs Across Seasons**

397 As recent studies have identified the importance of key bacterial species in protection of  
398 amphibians against *B. dendrobatidis* through the production of antifungal metabolites, we  
399 surveyed the wood frog microbiome for the presence of these putative antifungal bacterial  
400 species. Of the 37 bacterial genera found in the Antifungal Isolates Database that have isolated  
401 representatives demonstrating antifungal properties, 33 were present on *R. sylvatica* skin. The  
402 core genera from each seasonal group included putatively antifungal genera with several among  
403 the most prevalent genera overall, including *Pseudomonas*, *Massilia*, and  
404 *Allo/Neo/Para/Rhizobium*. Antifungal-associated genera varied in their relative abundances  
405 between wood frog skin microbiota samples, and mean relative abundances typically varied  
406 widely across seasons (**Table 6**).

## 407 **4 Discussion**

408 As we continue to improve our understanding of the skin microbiome and its role in  
409 maintaining the health of amphibians it is important to consider the inherent variability in  
410 microbial communities and the factors that drive this variability. While amphibians found in  
411 warmer regions may experience a relatively stable environment year-round, the majority of  
412 North America amphibians experience major seasonal fluctuations in environmental conditions.  
413 Changes in environmental conditions are known to influence the microbiome [4, 6, 7],  
414 potentially affecting the hosts ability to resist infection by a pathogen [18, 19]. In this study we

415 have reported on the microbial community associated with *R. sylvatica* skin over the course of  
416 multiple seasons to observe the changes in community composition and structure. To provide  
417 perspective for these seasonal effects, we have compared them to the effects of host sex and  
418 vernal pool site of capture within a single season (spring). Lastly, we have highlighted members  
419 of the wood frog skin microbial community that are reported in the Antifungal Isolates Database  
420 to produce molecules with antifungal activity, to tentatively predict the impact of season on the  
421 potential ability of the skin microbiome to contribute to defense against fungal pathogens.

#### 422 **4.1 Microbial Community Structure and Core Taxa**

423 We observed that the microbial community associated with *R. sylvatica* skin has much in  
424 common with those found on other frog species. ASVs belonging to Proteobacteria,  
425 Actinobacteria, Bacteroidetes, Firmicutes, Verrucomicrobia and Acidobacteria made up the vast  
426 majority of sequences observed from all samples, suggesting that these phyla dominate the  
427 microbiome. These phyla are commonly present on the skin of other frog species [3-5, 8] and all  
428 but Verrucomicrobia are abundant elements of the microbial communities associated with the  
429 related frog species *Rana pipiens* and *Rana catesbeiana* [1, 41]. While these phyla varied in  
430 abundance on the skin of individual wood frogs, there were very few cases in which any of the  
431 above bacterial phyla were found to be absent from the wood frog skin microbiota. Communities  
432 were much less consistent at finer taxonomic levels and among the hundreds of microbial genera  
433 observed, very few were prevalent enough to be considered core taxa. The most abundant of  
434 these core genera, *Sphingomonas* and *Pseudomonas*, are widespread in the environment at large  
435 and have been shown to be similarly abundant on the skin of other frogs [1, 6, 41].

436 Many of the core taxa associated with the skin microbiome are also known contaminants  
437 of commercial DNA extraction kits [42]. To better understand the extent to which microbial

438 contaminants introduced during the extraction process contributed to the microbial communities  
439 observed in our samples, we looked for ASVs present in both the samples and the process  
440 controls. While the majority of our frog samples (n = 43) had a low abundance (>5% relative  
441 abundance) of ASVs which were found in the process controls, a group of seven frog skin  
442 samples from Summer 2018 and Spring 2019 had very high (>50%) relative abundance of ASVs  
443 found in the process controls, which seems to indicate a high level of process contamination in  
444 these samples. Unexpectedly, all water samples had a very low abundance of ASVs found in the  
445 process control (0.07% average relative abundance) and completely lacked the *Curtobacterium*  
446 ASV which was highly abundant in process blanks, field blanks and frog samples. This suggests  
447 that potential contamination from reagents was not universal, or that many of the ASVs detected  
448 in the process controls were also naturally present on the frogs and surrounding environment.  
449 Additionally, samples with low numbers of detected amplicons did not have a proportionally  
450 higher relative abundance of ASVs found in the process controls, as would be expected of a  
451 failed skin swab which did not capture frog skin microbiota. Overall, while contamination from  
452 reagents and exposure to the laboratory environment was impossible to avoid, it does not appear  
453 to contribute to the observed trends in community structure.

#### 454 **4.2 Effect of Vernal Pool Site and Host Sex on the Wood Frog Skin Microbiome**

455 While *R. sylvatica* are generally terrestrial and solitary, wood frogs converge on vernal  
456 pools during the spring thaw to seek mates and reproduce [23]. In this study the two temporary  
457 ponds from which frogs were captured during the spring served as the only truly distinct  
458 sampling sites, since the surrounding area was fairly uniform mixed woodland. As *R. sylvatica*  
459 are known to venture as far as 1 km from their breeding pond and the ponds sampled are ~200 m  
460 apart it is unlikely that they harbor genetically distinct populations [43], and therefore any

461 variation in the skin-associated microbial community is better attributed to the environmental  
462 conditions of the site. This is an important distinction, as it is not well understood to what degree  
463 host phylogenetics and environment affect the microbiome of amphibians, and examples exist  
464 which emphasize the role of both factors [44-46]. Pond of origin was found to explain a small,  
465 but significant amount of the variation observed in the microbial communities on frogs captured  
466 during the spring. This effect was less pronounced than the variation between frogs captured in  
467 spring of 2018 and 2019 however, and the largest differences were observed between frog swabs  
468 and water samples. This was expected, as previous studies have established that amphibians have  
469 communities of skin-associated microbiota distinct from their environment [1, 41, 47]. There  
470 was no clear trend linking frog skin microbiomes to the microbiota found in the associated pond  
471 water. There was no significant difference in ASV richness, evenness or phylogenetic diversity  
472 between the skin-associated microbial communities in Pond 1 and Pond 2. Despite water samples  
473 from Pond 2 having a lower mean ASV richness than those of Pond 1, frogs from Pond 2 had  
474 more ASVs on average, suggesting that seeding of microbes from the water was not a major  
475 driver of skin microbiome diversity. Frogs from both ponds hosted bacterial phyla that were  
476 uncommon, or not present, in the pond water and exhibited more diverse and even communities,  
477 while water samples were almost entirely populated by Proteobacteria, Bacteroidetes and  
478 Actinobacteria. Given the increased abundance of many of these phyla on frogs captured during  
479 the summer and fall, it seems they must either be stable members of the microbiome or are  
480 seeded from rich microbial communities found in the soil and leaf litter of the surrounding forest.  
481 It is unclear whether seeding from soil environments might occur while buried during winter  
482 hibernation, and a study of the microbial communities present in frog hibernacula, although  
483 challenging, would be an interesting avenue of future research.

484           The effect of frog sex on the microbiome was also considered, as relationships between  
485 sex and skin microbiota have been observed in humans [48] and other vertebrates [49], but the  
486 effect of sex has not been well studied in amphibians. We found sex had no significant effect on  
487 structure or diversity of the microbial community. The few previous studies considering the  
488 effect of sex in amphibians failed to find significant differences between males and females [21,  
489 44], and our work, although limited by the low number of female frogs, corroborates these  
490 findings.

### 491 **4.3 Effect of Season on the Wood Frog Skin Microbiome**

492           Season was also associated with significant variation in the structure and composition of  
493 the wood frog skin microbiomes studied. The effect of season was more pronounced than the  
494 effects of site, year or sample type observed in the spring samples, and was evidenced by shifts  
495 in the abundance of major phyla on wood frog skin. Most notably, relative abundance of  
496 Acidobacteria was significantly higher among frogs captured in the summer and fall than those  
497 captured during spring. Given the particularly high abundance of Acidobacteria in soils [50] it is  
498 not surprising that members of this phylum would be highly abundant on frogs active in soil and  
499 leaf litter. The seasonality to Acidobacteria on frog skin matches a proposal that Acidobacteria  
500 are transiently associated with the human skin microbiome [51]. While the composition of the  
501 frog skin microbiome varied, average diversity of individual *R. sylvatica* microbiomes remained  
502 fairly constant across seasons. When considering ASV richness and phylogenetic diversity the  
503 Spring 2019 wood frog skin microbiota group was determined to have a mean diversity  
504 significantly different from Spring 2018 and Summer 2018. However, when considering the  
505 Shannon Diversity Index, wood frog skin microbiomes sampled during Spring 2019 falls well  
506 within the range of these groups. This suggests that the Spring 2019 wood frog microbial

507 communities were not as even, and a larger proportion of uncommon ASVs were contributing to  
508 their diversity. This is likely at least partially the result of the Spring 2019 samples undergoing  
509 an additional sequencing replicate. The resultant greater sequencing depth would increase the  
510 number of rare ASVs [52], and contribute to increased observed diversity. Rarefaction prior to  
511 diversity analyses was conducted to mitigate this issue, but it is not a perfect method [53].

512         Due to the much higher number of wood frog microbiome samples collected during the  
513 spring months (75% of total frog swab samples), any analysis considering overall prevalence of  
514 taxa was heavily biased toward taxa which were common during the spring. To better represent  
515 the microbial communities present on wood frog skin during summer and fall samples, core taxa  
516 were considered for each seasonal group individually and overlaps in seasonal groups' core taxa  
517 determined. As core taxa represent the microbes which are most commonly found in the frog  
518 skin environment and often represent key members of the microbial community [39], common  
519 core taxa should reflect similar community dynamics. The skin of *R. sylvatica* hosted only a  
520 small number of core microbiota, particularly at lower taxonomic levels. Several of the core taxa  
521 are known to be core to other frog skin communities, *Pseudomonas* being one of the most  
522 commonly represented [6, 38, 41], but the majority of core taxa appeared to be fairly unique.  
523 Additionally, many of the most prevalent taxa experienced significant changes in abundance  
524 between seasons. The families Beijerinckiaceae and Xanthobacteraceae were significantly more  
525 abundant in summer and fall, while Sphingobacteriaceae greatly increased in abundance during  
526 the summer only. The variability in the core taxa observed on *R. sylvatica* skin suggests that the  
527 skin microbiome is a highly dynamic environment, where seasonal factors can re-shape the core  
528 structure and few 'microbes are suited to inhabit the skin year-round.



#### 529 4.4 Seasonal Representation of Putatively Anti-fungal Microbes

530 Like many who study the amphibian microbiome, we aimed to improve our  
531 understanding of the trends which contribute to resistance to major pathogens. Our analysis  
532 focused on members of the frog skin microbial community that protect against *B. dendrobatidis*.  
533 Notably, we observed members of the genus *Janthinobacterium* on *R. sylvatica* skin, however it  
534 was not determined whether the ASV detected belonged to the protective species  
535 *Janthinobacterium lividum* [10, 17]. *Janthinobacterium* were most abundant in Spring 2018 and  
536 2019, were present on only one Summer 2018 frog and were entirely absent in Fall 2018.  
537 Additionally, members of the family Sphingobacteriaceae were found on frogs in all seasons.  
538 This is notable as presence of Sphingobacteriaceae was a predictor of successful recovery from  
539 *B. dendrobatidis* infection in other frog species [28]. Several other core taxa present on wood  
540 frog skin have known isolates which inhibit *B. dendrobatidis* listed in the Antifungal Isolates  
541 Database of amphibian skin-associated bacteria [40]. Burkholderiaceae and Xanthomonadaceae,  
542 in particular, have many genera with anti- *B. dendrobatidis* isolated members. Among the core  
543 genera, *Pseudomonas* and *Rhizobium* have the strongest evidence for *B. dendrobatidis* inhibition  
544 *in vitro* [40]. Aside from a spike in Burkholderiaceae abundance in Spring 2018, putatively anti-  
545 *B. dendrobatidis* taxa were not associated with any season in particular, and most were present at  
546 low abundance throughout the year. While these findings do not confirm that the bacterial taxa  
547 observed on *R. sylvatica* have antifungal activity, the organisms in our dataset associated with  
548 these groups are of interest as putatively anti-*B. dendrobatidis*. Further investigation is required  
549 to determine whether the specific microbial strains present on *R. sylvatica* possess anti-pathogen  
550 qualities to better understand the functional significance of seasonal variation in the skin  
551 microbiome and its contribution to defense against pathogens.

## 552 5 Conclusions

553 Our results indicate that season has a significant effect on the structure of the North  
554 American wood frog skin microbiome and has a proportionally greater effect than spring  
555 breeding pond association. Frogs captured during summer and fall were the most similar in terms  
556 of  $\beta$ -diversity distances and could be distinguished from spring frogs by their increased  
557 abundance of Acidobacteria, as well as other soil-associated bacterial families. It remains unclear  
558 whether the shift towards increased abundance of soil-associated bacteria on frog skin in the  
559 summer and fall is a result of transient colonization from frequent exposure, or a stable  
560 equilibrium shift in the community. Skin-associated microbial communities had consistent  
561 structural similarities at the highest taxonomic levels but displayed a high degree of diversity at  
562 finer levels, and the few core genera identified were not a dominant component of the  
563 community. Frogs captured during all seasons were host to microbes with putative anti- *B.*  
564 *dendrobatidis* activity, and seasonal shifts did not seem to affect the overall pool of potentially  
565 protective taxa. *R. sylvatica* is a widespread species and further study of populations from varied  
566 environments (Boreal shield, montane forest, etc.) could reveal related trends. While the effect of  
567 season has been briefly explored in other temperate frog species [4], this study provides insight  
568 into the seasonality of skin microbiome structure on amphibian species inhabiting northern  
569 environments and establishes foundational knowledge for further study of species which  
570 experience dramatic shifts in habitat and behavior between seasons.

571  
572 **Acknowledgements:** The authors thank Nicole Wang for the generous contribution of a trained  
573 taxonomic classifier for 16S rRNA gene sequences and Maxwell P. Bui-Marinos, Joseph F.A.  
574 Varga and Nathanael B. J. Harper for their technical assistance in collecting frog skin swabs.

575

576 **Author Contributions:** AJD, LAH and BAK conceived the study; AJD and BAK performed  
577 field sampling; AJD performed the experiments and analyzed the data; AJD, LAH and BAK  
578 wrote and critically revised the manuscript.

579

580 **Funding Information:** This study was funded by a Natural Sciences and Engineering Research  
581 Council of Canada Discovery Grant (NSERC DG) to BAK (Grant # RGPIN-2017-04218) a Tier  
582 II Canada Research Chair to LAH and salary support to AJD through a Natural Sciences and  
583 Engineering Research Council of Canada Undergraduate Summer Research Assistantship  
584 (NSERC USRA), the University of Waterloo Undergraduate Research Internship (URI) funding  
585 initiative, as well as a Graduate Research Studentship, Science Graduate Award, and UW  
586 Graduate Scholarship awarded by the University of Waterloo, Department of Biology.

587

588 **Data Availability:** 16S rRNA gene amplicon sequence data for skin microbiome samples are  
589 deposited in the NCBI Sequence Read Archive (Bioproject PRJNA603391).

590

591 **Compliance with Ethical Standards**

592

593 **Conflict of Interest:** The authors declare that they have no conflict of interest.

594

595 **Ethics Statement:** All applicable international, national, and/or institutional guidelines for the  
596 care and use of animals were followed. All procedures performed in studies involving animals

597 were in accordance with the ethical standards of the institution at which the studies were  
598 conducted (University of Waterloo Animal Care Committee and the Canadian Council on  
599 Animal Care, Animal Utilization Projects #30008 and #40721; and animals captured under the  
600 Ontario Ministry of Natural Resources and Forestry Wildlife Scientific Collectors Authorization  
601 Permits #1088586 and #1092603 issued to Dr. B.A. Katzenback). This article does not contain  
602 any studies with human participants performed by any of the authors.

603

## 604 **6 References**

- 605 1. McKenzie VJ, Bowers RM, Fierer N, et al (2012) Co-habiting amphibian species harbor  
606 unique skin bacterial communities in wild populations. *ISME J* 6:588–596.  
607 <https://doi.org/10.1038/ismej.2011.129>
- 608 2. Colombo BM, Scalvenzi T, Benlamara S, Pollet N (2015) Microbiota and mucosal  
609 immunity in amphibians. *Front. Immunol.* 6:1–15.  
610 <https://doi.org/10.3389/fimmu.2015.00111>
- 611 3. Walke JB, Becker MH, Hughey MC, et al (2015) Most of the dominant members of  
612 amphibian skin bacterial communities can be readily cultured. *Appl. Environ. Microbiol.*  
613 81:6589–6600. <https://doi.org/10.1128/AEM.01486-15>
- 614 4. Longo A V., Savage AE, Hewson I, Zamudio KR (2015) Seasonal and ontogenetic  
615 variation of skin microbial communities and relationships to natural disease dynamics in  
616 declining amphibians. *R. Soc. Open. Sci.* 2:140377. <https://doi.org/10.1098/rsos.140377>
- 617 5. Belden LK, Hughey MC, Rebollar EA, et al (2015) Panamanian frog species host unique  
618 skin bacterial communities. *Front. Microbiol.* 6:1171.  
619 <https://doi.org/10.3389/fmicb.2015.01171>
- 620 6. Ellison S, Rovito S, Parra-Olea G, et al (2018) The Influence of Habitat and Phylogeny  
621 on the Skin Microbiome of Amphibians in Guatemala and Mexico. *Microb. Ecol.* 1–11.  
622 <https://doi.org/10.1007/s00248-018-1288-8>
- 623 7. Costa S, Lopes I, Proença DN, et al (2016) Diversity of cutaneous microbiome of  
624 *Pelophylax perezii* populations inhabiting different environments. *Sci. Total Environ.*  
625 572:995–1004. <https://doi.org/10.1016/j.scitotenv.2016.07.230>
- 626 8. Varga JFA, Bui-Marinos MP, Katzenback BA (2019) Frog skin innate immune defences:  
627 Sensing and surviving pathogens. *Front. Immunol.* 10:3128.  
628 <https://doi.org/10.3389/fimmu.2018.03128>
- 629 9. Woodhams DC, Vredenburg VT, Simon MA, et al (2007) Symbiotic bacteria contribute  
630 to innate immune defenses of the threatened mountain yellow-legged frog, *Rana*  
631 *muscosa*. *Biol. Conserv.* 138:390–398. <https://doi.org/10.1016/j.biocon.2007.05.004>
- 632 10. Harris RN, Brucker RM, Walke JB, et al (2009) Skin microbes on frogs prevent  
633 morbidity and mortality caused by a lethal skin fungus. *ISME J* 3:818–824.  
634 <https://doi.org/10.1038/ismej.2009.27>

- 635 11. Brucker RM, Baylor CM, Walters RL, et al (2008) The identification of 2,4-  
636 diacetylphloroglucinol as an antifungal metabolite produced by cutaneous bacteria of the  
637 salamander *Plethodon cinereus*. J Chem. Ecol. 34:39–43. [https://doi.org/10.1007/s10886-](https://doi.org/10.1007/s10886-007-9352-8)  
638 007-9352-8
- 639 12. Lauer A, Simon MA, Banning JL, et al (2007) Common Cutaneous Bacteria from the  
640 Eastern Red-Backed Salamander Can Inhibit Pathogenic Fungi. Copeia 2007:630–640.  
641 [https://doi.org/10.1643/0045-8511\(2007\)2007\[630:CCBFTE\]2.0.CO;2](https://doi.org/10.1643/0045-8511(2007)2007[630:CCBFTE]2.0.CO;2)
- 642 13. Lauer A, Simon MA, Banning JL, et al (2008) Diversity of cutaneous bacteria with  
643 antifungal activity isolated from female four-toed salamanders. ISME J 2:145–157.  
644 <https://doi.org/10.1038/ismej.2007.110>
- 645 14. Daszak P, Cunningham AA, Hyatt AD (2003) Infectious disease and amphibian  
646 population declines. Divers. Distrib. 9:141–150.  
647 <https://doi.org/10.1046/j.1472-4642.2003.00016.x>
- 648 15. Kilpatrick AM, Briggs CJ, Daszak P (2010) The ecology and impact of chytridiomycosis:  
649 an emerging disease of amphibians. Trends Ecol. Evol. 25:109–118.  
650 <https://doi.org/10.1016/j.tree.2009.07.011>
- 651 16. Harris RN, Lauer A, Simon MA, et al (2009) Addition of antifungal skin bacteria to  
652 salamanders ameliorates the effects of chytridiomycosis. Dis. Aquat. Organ. 83:11–16.  
653 <https://doi.org/10.3354/dao02004>
- 654 17. Kueneman JG, Woodhams DC, Harris R, et al (2016) Probiotic treatment restores  
655 protection against lethal fungal infection lost during amphibian captivity. Proc. R. Soc. B.  
656 Biol. Sci. 283:20161553. <https://doi.org/10.1098/rspb.2016.1553>
- 657 18. Muletz-Wolz CR, Almario JG, Barnett SE, et al (2017) Inhibition of fungal pathogens  
658 across genotypes and temperatures by amphibian skin bacteria. Front. Microbiol. 8:1551.  
659 <https://doi.org/10.3389/fmicb.2017.01551>
- 660 19. Ellison S, Knapp RA, Sparagon W, et al (2019) Reduced skin bacterial diversity  
661 correlates with increased pathogen infection intensity in an endangered amphibian host.  
662 Mol. Ecol. 28:127–140. <https://doi.org/10.1111/mec.14964>
- 663 20. Walke JB, Becker MH, Loftus SC, et al (2015) Community structure and function of  
664 amphibian skin microbes: An experiment with bullfrogs exposed to a chytrid fungus.  
665 PLoS One 10:e0139848. <https://doi.org/10.1371/journal.pone.0139848>
- 666 21. Campbell LJ, Garner TWJ, Hopkins K, et al (2019) Outbreaks of an Emerging Viral  
667 Disease Covary With Differences in the Composition of the Skin Microbiome of a Wild  
668 United Kingdom Amphibian. Front. Microbiol. 10:1245.  
669 <https://doi.org/10.3389/fmicb.2019.01245>
- 670 22. Berven KA, Gill DE (1983) Interpreting geographic variation in life-history traits. Integr.  
671 Comp. Biol. 23:85–97. <https://doi.org/10.1093/icb/23.1.85>
- 672 23. Berven KA (1990) Factors affecting population fluctuations in larval and adult stages of  
673 the wood frog (*Rana sylvatica*). Ecology 71:1599–1608. <https://doi.org/10.2307/1938295>
- 674 24. Matutte B, Storey KB, Knoop FC, Conlon JM (2000) Induction of synthesis of an  
675 antimicrobial peptide in the skin of the freeze-tolerant frog, *Rana sylvatica*, in response to  
676 environmental stimuli. FEBS Lett. 483:135–138. [https://doi.org/10.1016/S0014-](https://doi.org/10.1016/S0014-5793(00)02102-5)  
677 5793(00)02102-5
- 678 25. Storey KB, Storey JSKM (1992) Natural Freeze Tolerance In Ectothermic Vertebrates.  
679 Annu. Rev. Physiol. 54:619–637. <https://doi.org/10.1146/annurev.physiol.54.1.619>

- 680 26. Gahl MK, Longcore JE, Houlahan JE (2012) Varying Responses of Northeastern North  
681 American Amphibians to the Chytrid Pathogen *Batrachochytrium dendrobatidis*.  
682 *Conserv. Biol.* 26:135–141. <https://doi.org/10.1111/j.1523-1739.2011.01801.x>
- 683 27. Forzán MJ, Jones KM, Ariel E, et al (2017) Pathogenesis of Frog Virus 3 (Ranavirus,  
684 Iridoviridae) Infection in Wood Frogs (*Rana sylvatica*). *Vet. Pathol.* 54:531–548.  
685 <https://doi.org/10.1177/0300985816684929>
- 686 28. Becker MH, Walke JB, Cikanek S, et al (2015) Composition of symbiotic bacteria  
687 predicts survival in Panamanian golden frogs infected with a lethal fungus. *Proc. R. Soc.*  
688 *B. Biol. Sci.* 282:20142881–20142881. <https://doi.org/10.1098/rspb.2014.2881>
- 689 29. Rebollar EA, Gutiérrez-Preciado A, Noecker C, et al (2018) The skin microbiome of the  
690 neotropical frog *Craugastor fitzingeri*: Inferring potential bacterial-host-pathogen  
691 interactions from metagenomic data. *Front. Microbiol.* 9:466.  
692 <https://doi.org/10.3389/fmicb.2018.00466>
- 693 30. Walters W, Hyde ER, Berg-Lyons D, et al (2016) Improved Bacterial 16S rRNA Gene  
694 (V4 and V4-5) and Fungal Internal Transcribed Spacer Marker Gene Primers for  
695 Microbial Community Surveys. *mSystems* 1:e00009-15.  
696 <https://doi.org/10.1128/mSystems.00009-15>
- 697 31. Apprill A, McNally S, Parsons R, Weber L (2015) Minor revision to V4 region SSU  
698 rRNA 806R gene primer greatly increases detection of SAR11 bacterioplankton. *Aquat.*  
699 *Microb. Ecol.* 75:129–137. <https://doi.org/10.3354/ame01753>
- 700 32. Parada AE, Needham DM, Fuhrman JA (2016) Every base matters: Assessing small  
701 subunit rRNA primers for marine microbiomes with mock communities, time series and  
702 global field samples. *Environ. Microbiol.* 18:1403–1414. <https://doi.org/10.1111/1462-2920.13023>
- 704 33. Bolyen E, Rideout JR, Dillon MR, et al (2019) Reproducible, interactive, scalable and  
705 extensible microbiome data science using QIIME 2. *Nat. Biotechnol.* 37:852–857.  
706 <https://doi.org/10.1038/s41587-019-0209-9>
- 707 34. Callahan BJ, McMurdie PJ, Rosen MJ, et al (2016) DADA2: High-resolution sample  
708 inference from Illumina amplicon data. *Nat. Methods.* 13:581–583.  
709 <https://doi.org/10.1038/nmeth.3869>
- 710 35. Yilmaz P, Parfrey LW, Yarza P, et al (2014) The SILVA and “all-species Living Tree  
711 Project (LTP)” taxonomic frameworks. *Nucleic Acids Res.* 42:D643–D648.  
712 <https://doi.org/10.1093/nar/gkt1209>
- 713 36. Katoh, K., Misawa, K., Kuma, K., Miyata T (2002) MAFFT: a novel method for rapid  
714 multiple sequence alignment based on fast Fourier transform. *Nucleic Acids Res.*  
715 30:3059–3066. <https://doi.org/10.1093/nar/gkf436>
- 716 37. Stamatakis A (2014) RAxML version 8: A tool for phylogenetic analysis and post-  
717 analysis of large phylogenies. *Bioinformatics* 30:1312–1313.  
718 <https://doi.org/10.1093/bioinformatics/btu033>
- 719 38. Medina D, Hughey MC, Becker MH, et al (2017) Variation in Metabolite Profiles of  
720 Amphibian Skin Bacterial Communities Across Elevations in the Neotropics. *Microb.*  
721 *Ecol.* 74:227–238. <https://doi.org/10.1007/s00248-017-0933-y>
- 722 39. Shade A, Handelsman J (2012) Beyond the Venn diagram: The hunt for a core  
723 microbiome. *Environ. Microbiol.* 14:4–12. <https://doi.org/10.1111/j.1462-2920.2011.02585.x>
- 724



- 725 40. Woodhams DC, Alford RA, Antwis RE, et al (2015) Antifungal isolates database of  
726 amphibian skin-associated bacteria and function against emerging fungal pathogens.  
727 Ecology 96:595–595. <https://doi.org/10.1890/14-1837.1>
- 728 41. Walke JB, Becker MH, Loftus SC, et al (2014) Amphibian skin may select for rare  
729 environmental microbes. ISME J 8:2207–2217. <https://doi.org/10.1038/ismej.2014.77>
- 730 42. Salter SJ, Cox MJ, Turek EM, et al (2014) Reagent and laboratory contamination can  
731 critically impact sequence-based microbiome analyses. BMC Biol. 12:87.  
732 <https://doi.org/10.1186/s12915-014-0087-z>
- 733 43. Berven KA, Grudzien TA (1990) Dispersal in the Wood Frog (*Rana sylvatica*):  
734 Implications for Genetic Population Structure. Evolution (N Y) 44:2047-2056.  
735 <https://doi.org/10.2307/2409614>
- 736 44. Prado-Irwin SR, Bird AK, Zink AG, Vredenburg VT (2017) Intraspecific Variation in the  
737 Skin-Associated Microbiome of a Terrestrial Salamander. Microb. Ecol. 74:745–756.  
738 <https://doi.org/10.1007/s00248-017-0986-y>
- 739 45. Muletz Wolz CR, Yarwood SA, Campbell Grant EH, et al (2018) Effects of host species  
740 and environment on the skin microbiome of Plethodontid salamanders. J. Anim. Ecol.  
741 87:341–353. <https://doi.org/10.1111/1365-2656.12726>
- 742 46. Bletz MC, Archer H, Harris RN, et al (2017) Host ecology rather than host phylogeny  
743 drives amphibian skin microbial community structure in the biodiversity hotspot of  
744 Madagascar. Front. Microbiol. 8:1530. <https://doi.org/10.3389/fmicb.2017.01530>
- 745 47. Albecker MA, Belden LK, McCoy MW (2018) Comparative Analysis of Anuran  
746 Amphibian Skin Microbiomes Across Inland and Coastal Wetlands. Microb. Ecol.  
747 78:348. <https://doi.org/10.1007/s00248-018-1295-9>
- 748 48. Fierer N, Hamady M, Lauber CL, Knight R (2008) The influence of sex, handedness, and  
749 washing on the diversity of hand surface bacteria. Proc. Natl. Acad. Sci. 105:17994–  
750 17999. <https://doi.org/10.1073/pnas.0807920105>
- 751 49. Saag P, Tilgar V, Mänd R, et al (2011) Plumage Bacterial Assemblages in a Breeding  
752 Wild Passerine: Relationships with Ecological Factors and Body Condition. Microb.  
753 Ecol. 61:740–749. <https://doi.org/10.1007/s00248-010-9789-0>
- 754 50. Kielak AM, Barreto CC, Kowalchuk GA, et al (2016) The ecology of Acidobacteria:  
755 Moving beyond genes and genomes. Front. Microbiol. 7:744  
756 <https://doi.org/10.3389/fmicb.2016.00744>
- 757 51. Grönroos M, Parajuli A, Laitinen OH, et al (2019) Short-term direct contact with soil and  
758 plant materials leads to an immediate increase in diversity of skin microbiota.  
759 MicrobiologyOpen 8:e00645. <https://doi.org/10.1002/mbo3.645>
- 760 52. Zaheer R, Noyes N, Ortega Polo R, et al (2018) Impact of sequencing depth on the  
761 characterization of the microbiome and resistome. Sci. Rep. 8:5890.  
762 <https://doi.org/10.1038/s41598-018-24280-8>
- 763 53. McMurdie PJ, Holmes S (2014) Waste Not, Want Not: Why Rarefying Microbiome Data  
764 Is Inadmissible. PLoS Comput. Biol. 10:e1003531.  
765 <https://doi.org/10.1371/journal.pcbi.1003531>

766

767 **Figure Legends**

768

769 **Fig. 1** Comparison of frog swab and pond water  $\alpha$ -diversity metrics. Sample  $\alpha$ -diversity was  
770 calculated using a sampling depth of 10,000. Mean seasonal value and standard deviation of each  
771 group is shown. Results are given for **(a)** ASV Richness, **(b)** Shannon's Diversity Index and **(c)**  
772 Faith's Phylogenetic Diversity

773

774 **Fig. 2** Relative frequency of microbial phyla ASVs present in individual *R. sylvatica* skin swab  
775 samples and controls. Phyla are listed from top to bottom in order of decreasing summed total  
776 ASV frequency. Bars represent relative frequency within a sample and are given in  
777 corresponding order

778

779 **Fig. 3** Principal coordinate analysis of  $\beta$ -diversity of spring frog skin and pond water  
780 microbiome samples. Principal coordinate analysis plots were created using Emperor from  
781 distance matrices calculated using a sampling depth of 10,000. Plots were limited to representing  
782 the two dimensions with the highest percent variation explained and were calculated for **(a)**  
783 Unweighted UniFrac distances, **(b)** Weighted UniFrac distances, and **(c)** Bray-Curtis distances

784

785 **Fig. 4** Comparison of seasonal wood frog skin microbiota  $\alpha$ -diversity metrics. Sample  $\alpha$ -  
786 diversity was calculated using a sampling depth of 10,000. Mean seasonal value and standard  
787 deviation of each group is shown. Results are given for **(a)** ASV Richness, **(b)** Shannon's  
788 Diversity Index and **(c)** Faith's Phylogenetic Diversity

789



790 **Fig. 5** Principal coordinate analysis of  $\beta$ -diversity of frog skin microbiome samples. Principal  
791 coordinate analysis plots were created using Emperor from distance matrices calculated using a  
792 sampling depth of 10,000. Plots were limited to representing the two dimensions with the highest  
793 percent variation explained and were calculated for **(a)** Unweighted UniFrac distances, **(b)**  
794 Weighted UniFrac distances, and **(c)** Bray-Curtis distances

795

796 **Fig. 6** Relative abundance of core microbial families in wood frog skin microbiota. Families  
797 included were present in  $\geq 90\%$  of all frog skin samples and had a mean relative abundance  $\geq 1\%$ .  
798 Abundance of each family was compared between seasonal groups using pair-wise ANOVA,  
799 letters are used to indicate significant inter-seasonal variation for a given family. Seasons marked  
800 with the same letter do not significantly differ.

801

802 **Fig. 7** Overlap of core microbial families present on wood frog skin across seasons. Core taxa  
803 were defined as those found in 90% or more samples from a given season. Taxa were combined  
804 at the level of **(a)** genus and **(b)** family, omitting entries with ambiguous taxonomy

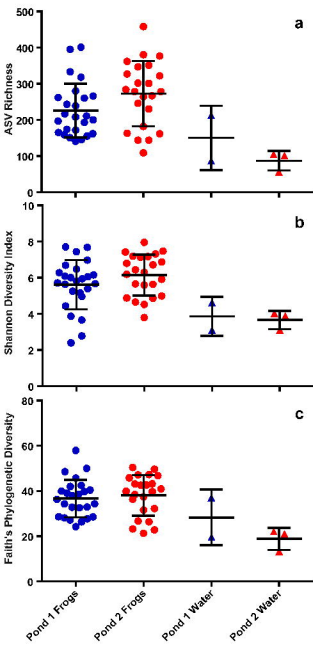

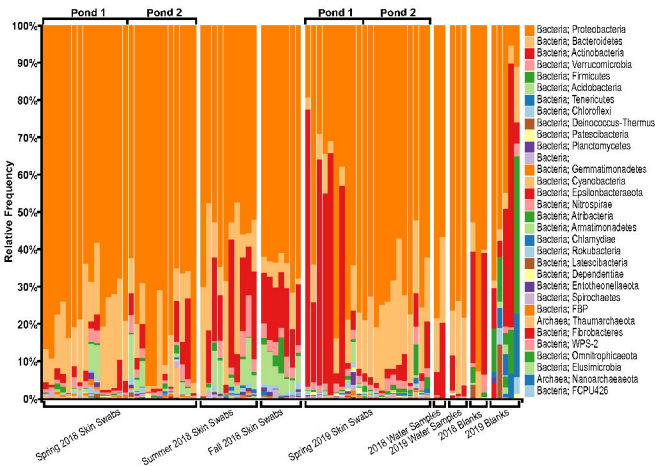

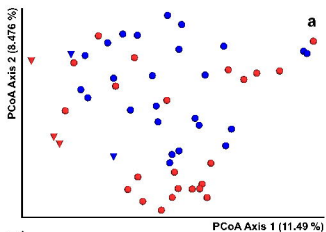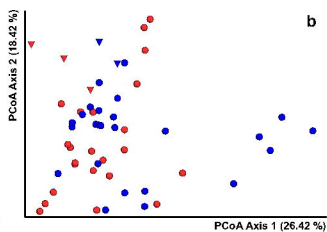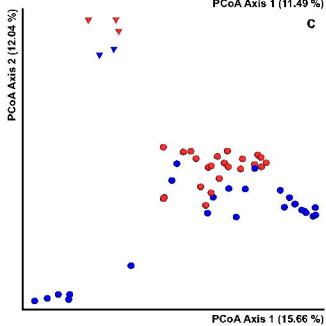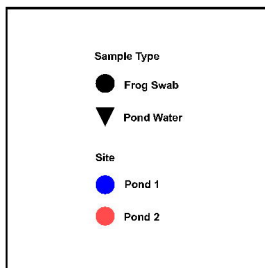

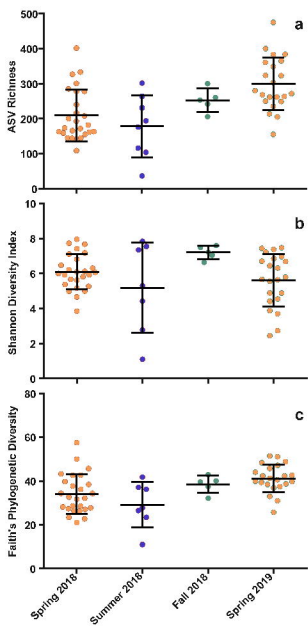

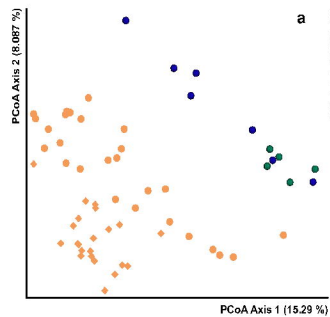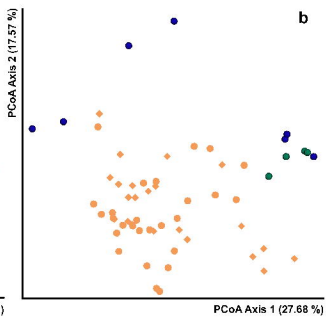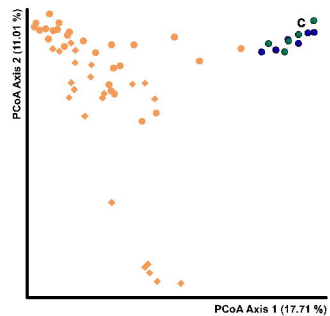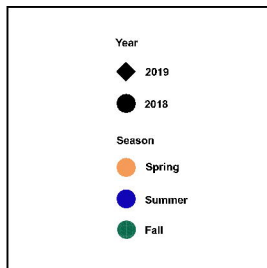

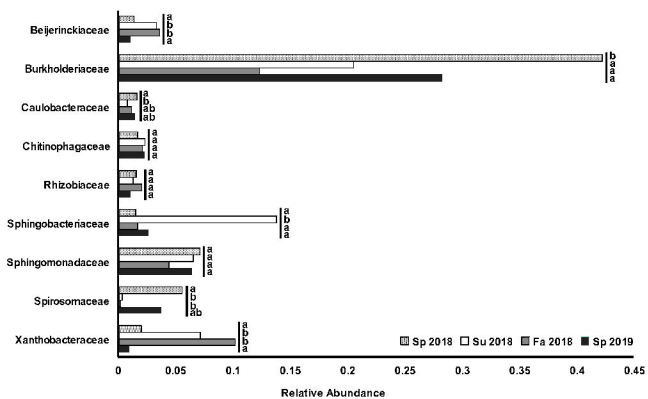

Genera

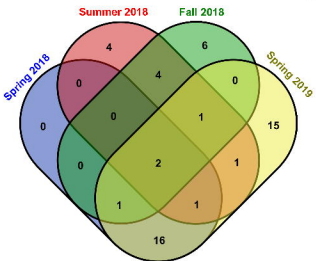

a

Families

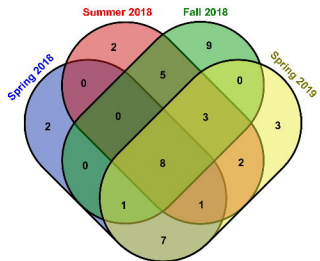

b



**Table 1** Summary of frog skin swab samples. Season, site and sex of frog are given for each skin swab sample. Male frogs are denoted with an “M”, while females are denoted with an “F”

| Season      | Capture Site |            |              |
|-------------|--------------|------------|--------------|
|             | Pond 1       | Pond 2     | Forest Floor |
| Spring 2018 | 13 M / 2 F   | 8 M / 4 F  |              |
| Summer 2018 |              |            | 11 M / 0 F   |
| Fall 2018   |              |            | 5 M / 2 F    |
| Spring 2019 | 10 M / 0 F   | 12 M / 0 F |              |

**Table 2** Summary of *adonis* (PERMANOVA) models of  $\beta$ -diversity for microbial communities on frog skin during spring months and in pond water samples. Effects on variation due to sample type (frog skin, water), site (Pond 1, Pond 2) and year (2018, 2019) are considered. Significant results are marked with an asterisk

| <b>Variables</b>                      | <b>Degrees of Freedom</b> | <b>Sums of Squares</b> | <b>Mean Squares</b> | <b>F.Model</b> | <b>R<sup>2</sup></b> | <b>p</b> |
|---------------------------------------|---------------------------|------------------------|---------------------|----------------|----------------------|----------|
| <b>a) Unweighted UniFrac Distance</b> |                           |                        |                     |                |                      |          |
| <i>Sample Type</i>                    | 1                         | 0.69                   | 0.69                | 4.08           | 0.07                 | 0.001*   |
| <i>Site</i>                           | 1                         | 0.48                   | 0.48                | 2.85           | 0.05                 | 0.001*   |
| <i>Year</i>                           | 1                         | 0.70                   | 0.70                | 4.20           | 0.07                 | 0.001*   |
| <i>Residuals</i>                      |                           | 8.23                   | 0.17                |                | 0.81                 |          |
| <i>Total</i>                          |                           | 10.10                  |                     |                | 1.00                 |          |
| <b>b) Weighted UniFrac Distance</b>   |                           |                        |                     |                |                      |          |
| <i>Sample Type</i>                    | 1                         | 0.66                   | 0.66                | 6.86           | 0.11                 | 0.001*   |
| <i>Site</i>                           | 1                         | 0.30                   | 0.30                | 3.13           | 0.05                 | 0.005*   |
| <i>Year</i>                           | 1                         | 0.44                   | 0.44                | 4.54           | 0.07                 | 0.001*   |
| <i>Residuals</i>                      |                           | 4.70                   | 0.10                |                | 0.77                 |          |
| <i>Total</i>                          |                           | 6.10                   |                     |                | 1.00                 |          |
| <b>c) Bray-Curtis Dissimilarity</b>   |                           |                        |                     |                |                      |          |
| <i>Sample Type</i>                    | 1                         | 1.83                   | 1.83                | 7.71           | 0.12                 | 0.001*   |
| <i>Site</i>                           | 1                         | 1.12                   | 1.12                | 4.70           | 0.07                 | 0.001*   |
| <i>Year</i>                           | 1                         | 1.28                   | 1.28                | 5.39           | 0.08                 | 0.001*   |
| <i>Residuals</i>                      |                           | 11.64                  | 0.24                |                | 0.73                 |          |
| <i>Total</i>                          |                           | 15.87                  |                     |                | 1.00                 |          |

**Table 3** Summary of *adonis* (PERMANOVA) models of  $\beta$ -diversity for microbial communities on frog skin swab samples. Effects on variation due to season (spring, summer, fall) are considered. Significant results are marked with an asterisk

| <b>Variables</b>                      | <b>Degrees of Freedom</b> | <b>Sums of Squares</b> | <b>Mean Squares</b> | <b>F.Model</b> | <b>R<sup>2</sup></b> | <b>p</b> |
|---------------------------------------|---------------------------|------------------------|---------------------|----------------|----------------------|----------|
| <b>a) Unweighted UniFrac Distance</b> |                           |                        |                     |                |                      |          |
| <i>Season</i>                         | 2                         | 1.61                   | 0.80                | 4.36           | 0.13                 | 0.001*   |
| <i>Residuals</i>                      |                           | 10.51                  | 0.18                |                | 0.87                 |          |
| <i>Total</i>                          |                           | 12.12                  |                     |                | 1.00                 |          |
| <b>b) Weighted UniFrac Distance</b>   |                           |                        |                     |                |                      |          |
| <i>Season</i>                         | 2                         | 1.73                   | 0.86                | 7.04           | 0.20                 | 0.001*   |
| <i>Residuals</i>                      |                           | 6.99                   | 0.12                |                | 0.80                 |          |
| <i>Total</i>                          |                           | 8.72                   |                     |                | 1.00                 |          |
| <b>c) Bray-Curtis Dissimilarity</b>   |                           |                        |                     |                |                      |          |
| <i>Season</i>                         | 2                         | 3.59                   | 1.79                | 6.17           | 0.18                 | 0.001*   |
| <i>Residuals</i>                      |                           | 16.57                  | 0.29                |                | 0.82                 |          |
| <i>Total</i>                          |                           | 20.15                  |                     |                | 1.00                 |          |

**Table 4** Core microbiome genera and their mean relative abundance. Listed genera are present in  $\geq 90\%$  of all frog skin swab samples. If a microbial genus was not core to every seasonal group (“All”), seasonal groups for which the microbial genera was present in  $\geq 90\%$  of individual frog skin swab samples are listed. Wood frog skin swabs collected during different seasons are denoted in abbreviated form [spring (Sp), summer (Su) and fall (Fa) and corresponding year ((20)18 or 19)]

| Genera                         | Phylum         | Mean Relative Abundance | Seasonally Core  |
|--------------------------------|----------------|-------------------------|------------------|
| Ferruginobacter                | Bacteroidetes  | 0.009                   | Sp18, Sp19       |
| Uncultured<br>Chitinophagaceae | Bacteroidetes  | 0.007                   | Sp18, Su18, Sp19 |
| Methylobacterium               | Proteobacteria | 0.006                   | Su18, Fa18, Sp19 |
| Allo/Neo/Para/Rhizobium        | Proteobacteria | 0.008                   | All              |
| Sphingomonas                   | Proteobacteria | 0.038                   | All              |
| Massilia                       | Proteobacteria | 0.019                   | Sp18, Sp19       |
| Pseudomonas                    | Proteobacteria | 0.026                   | Su18, Sp19       |

**Table 5** Core microbiome families and their mean relative abundance. Listed families are present in  $\geq 90\%$  of all frog skin swab samples. If a microbial family was not core to every seasonal group (“All”), seasonal groups for which the microbial family was present in  $\geq 90\%$  of individual frog skin swab samples are listed. Wood frog skin swabs collected during different seasons are denoted in abbreviated form [spring (Sp), summer (Su) and fall (Fa) and corresponding year ((20)18 or 19)]

| Family              | Phylum         | Mean Relative Abundance | Seasonally Core  |
|---------------------|----------------|-------------------------|------------------|
| Chitinophagaceae    | Bacteroidetes  | 0.019                   | All              |
| Spirosomaceae       | Bacteroidetes  | 0.037                   | Sp18, Sp19       |
| Sphingobacteriaceae | Bacteroidetes  | 0.039                   | Sp18, Su18, Sp19 |
| Acetobacteraceae    | Proteobacteria | 0.009                   | Su18, Fa18, Sp19 |
| Caulobacteraceae    | Proteobacteria | 0.014                   | All              |
| Beijerinckiaceae    | Proteobacteria | 0.014                   | All              |
| Rhizobiaceae        | Proteobacteria | 0.013                   | All              |
| Xanthobacteraceae   | Proteobacteria | 0.021                   | All              |
| Sphingomonadaceae   | Proteobacteria | 0.062                   | All              |
| Burkholderiaceae    | Proteobacteria | 0.329                   | All              |
| Xanthomonadaceae    | Proteobacteria | 0.00401                 | All              |

**Table 6** Putatively antifungal genera and their seasonal relative abundances. Genera which are found on *R. sylvatica* skin and have antifungal isolates listed in the Antifungal Isolates Database (Woodhams et al., 2015) are listed. Darker shading indicates greater relative abundance

| Genus                                                     | Mean Relative Abundance |             |           |             |
|-----------------------------------------------------------|-------------------------|-------------|-----------|-------------|
|                                                           | Spring 2018             | Summer 2018 | Fall 2018 | Spring 2019 |
| <i>Acinetobacter</i>                                      | 0.008                   | 0.004       | 0.000     | 0.000       |
| <i>Aeromonas</i>                                          | 0.003                   | 0.001       | 0.001     | 0.000       |
| <i>Allorhizobium-Neorhizobium-Pararhizobium-Rhizobium</i> | 0.008                   | 0.006       | 0.014     | 0.007       |
| <i>Bacillus</i>                                           | 0.000                   | 0.001       | 0.002     | 0.000       |
| <i>Brevundimonas</i>                                      | 0.010                   | 0.001       | 0.001     | 0.006       |
| <i>Burkholderia-Caballeronia-Paraburkholderia</i>         | 0.000                   | 0.006       | 0.051     | 0.001       |
| <i>Chryseobacterium</i>                                   | 0.015                   | 0.001       | 0.000     | 0.016       |
| <i>Comamonas</i>                                          | 0.000                   | 0.001       | 0.001     | 0.000       |
| <i>Curtobacterium</i>                                     | 0.004                   | 0.013       | 0.003     | 0.162       |
| <i>Duganella</i>                                          | 0.011                   | 0.001       | 0.002     | 0.006       |
| <i>Dyella</i>                                             | 0.000                   | 0.001       | 0.010     | 0.000       |
| <i>Flavobacterium</i>                                     | 0.015                   | 0.000       | 0.008     | 0.029       |
| <i>Janthinobacterium</i>                                  | 0.003                   | 0.000       | 0.000     | 0.003       |
| <i>Lactococcus</i>                                        | 0.000                   | 0.000       | 0.000     | 0.000       |
| <i>Lysobacter</i>                                         | 0.000                   | 0.001       | 0.001     | 0.000       |
| <i>Massilia</i>                                           | 0.030                   | 0.002       | 0.004     | 0.018       |
| <i>Micrococcus</i>                                        | 0.000                   | 0.002       | 0.000     | 0.000       |
| <i>Novosphingobium</i>                                    | 0.006                   | 0.002       | 0.003     | 0.009       |
| <i>Paenibacillus</i>                                      | 0.005                   | 0.006       | 0.007     | 0.005       |
| <i>Pantoea</i>                                            | 0.000                   | 0.001       | 0.000     | 0.000       |
| <i>Pedobacter</i>                                         | 0.007                   | 0.003       | 0.003     | 0.019       |
| <i>Polaromonas</i>                                        | 0.003                   | 0.000       | 0.003     | 0.009       |
| <i>Pseudomonas</i>                                        | 0.012                   | 0.009       | 0.037     | 0.037       |
| <i>Pseudoxanthomonas</i>                                  | 0.000                   | 0.000       | 0.000     | 0.000       |
| <i>Serratia</i>                                           | 0.000                   | 0.000       | 0.000     | 0.000       |
| <i>Silvimonas</i>                                         | 0.000                   | 0.000       | 0.003     | 0.000       |
| <i>Sphingobacterium</i>                                   | 0.000                   | 0.001       | 0.000     | 0.000       |
| <i>Staphylococcus</i>                                     | 0.001                   | 0.004       | 0.017     | 0.000       |
| <i>Stenotrophomonas</i>                                   | 0.000                   | 0.001       | 0.006     | 0.001       |
| <i>Streptomyces</i>                                       | 0.001                   | 0.001       | 0.005     | 0.000       |
| <i>Undibacterium</i>                                      | 0.007                   | 0.000       | 0.000     | 0.009       |
| <i>Variovorax</i>                                         | 0.005                   | 0.006       | 0.007     | 0.005       |
